# Supplementary material for: Enhancing digestibility and ethanol yield of Populus wood via expression of an engineered monolignol 4-O-methyltransferase
Source: PubMed Central journal article supplement (PMC4931242; doi:10.1038/ncomms11989), 2016-06-28
Supplement: ncomms11989-s1.pdf [file ncomms11989-s1.pdf]

1

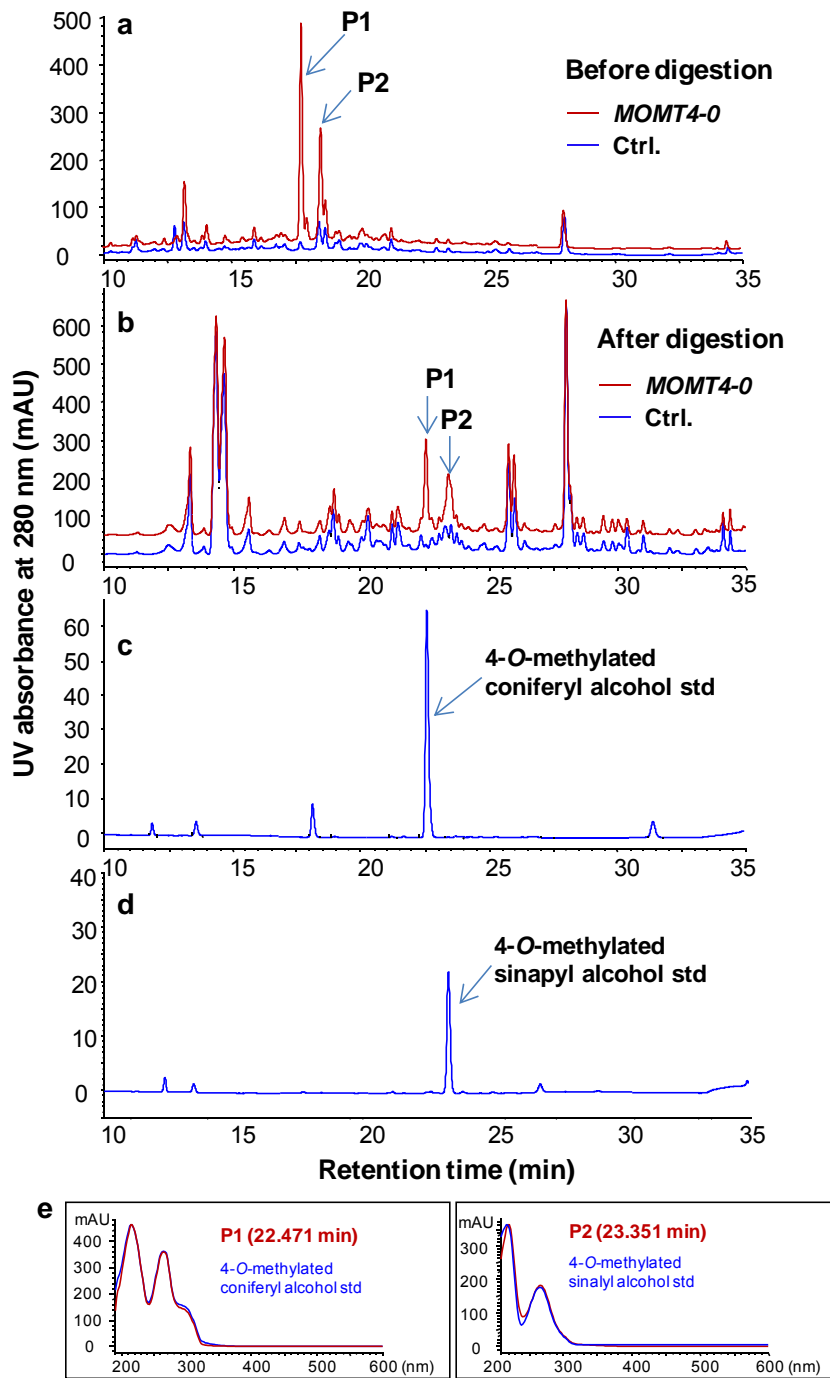

2

3

4

Supplementary Figure 1 (Contl. on page 2)

5

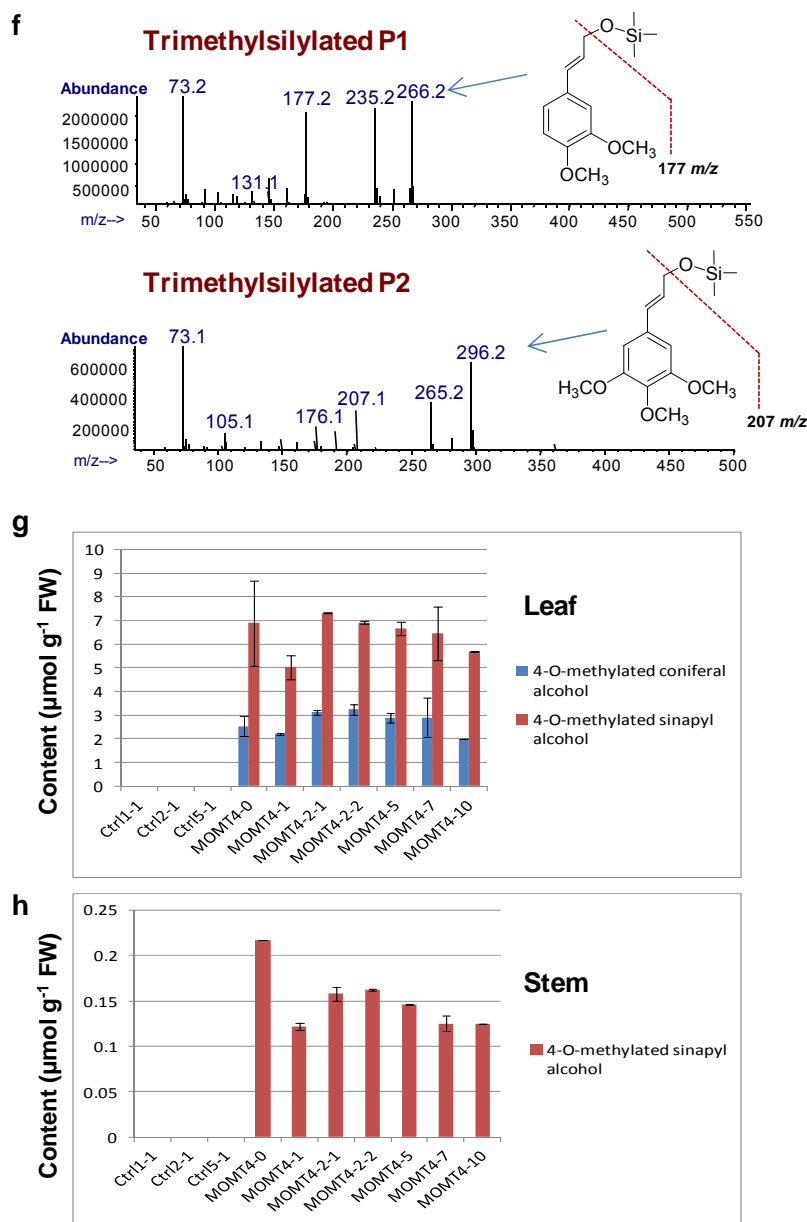

6

7 **Supplementary Figure 1. Characterization of methanol extractable phenolics from the**  
 8 ***MOMET4* transgenic and control aspens. (a) HPLC profiling of methanol-extractable phenolics**  
 9 **from the leaves of *MOMET4-0* transgenic and control aspens before  $\beta$ -glucosidase digestion. (b)**  
 10 **HPLC profiling of methanol-extractable phenolics in (a) after  $\beta$ -glucosidase digestion. Two**  
 11 **unique compounds were detected in the *MOMET4-0* with P1 identical to the prepared authentic**  
 12 **standard of 4-*O*-methylated coniferyl alcohol (c) and P2 identical to 4-*O*-methylated sinapyl**  
 13 **alcohol standard (d). (e) UV spectra of P1 and P2 in (b), compared to those of the prepared**  
 14 **standards. (f) Mass spectra of two detected unique metabolites in the leaf extracts of *MOMET4-0***  
 15 **(after  $\beta$ -glucosidase digestion). (g) Accumulation level of the 4-*O*-methylated monolignols in the**  
 16 **2-month-old aspen leaves. (h) Accumulation level of the 4-*O*-methylated monolignols in the 2-**  
 17 **month-old stems; only 4-*O*-methylated sinapyl alcohol was detected in the transgenic stem**  
 18 **extract. Data are mean  $\pm$  s.d. from two experimental repeats. FW: Fresh weight.**

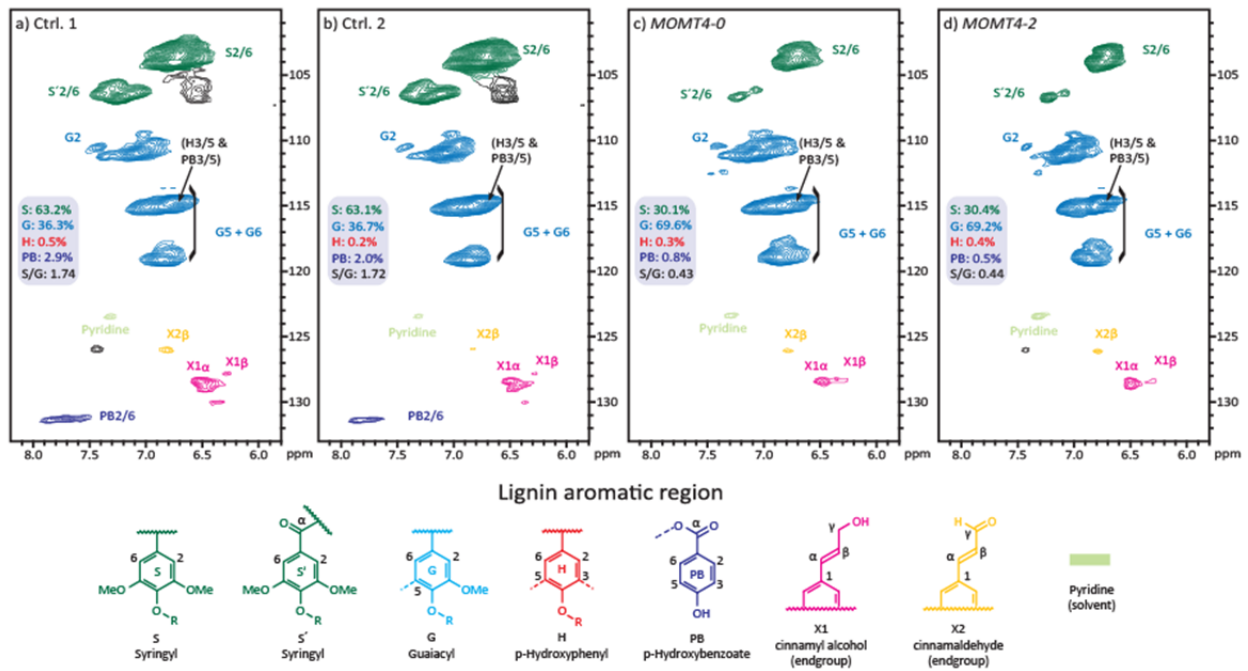

20

21

22 **Supplementary Figure 2. Partial short range 2D HSQC NMR spectra of aromatic region.**

23 Equal amounts of solubilized total cell walls from two controls (**a** and **b**) and two *MOMT4*  
 24 transgenic plants (*MOMT4-0* and *MOMT4-2*) (**c** and **d**) were examined. The main structural units  
 25 are colored to coincide with their structures at the bottom.

26

27

28

29

30

31

32

33

34

35

36

37

38

39

40

41

42

43

44

45

46

47  
48  
49  
50

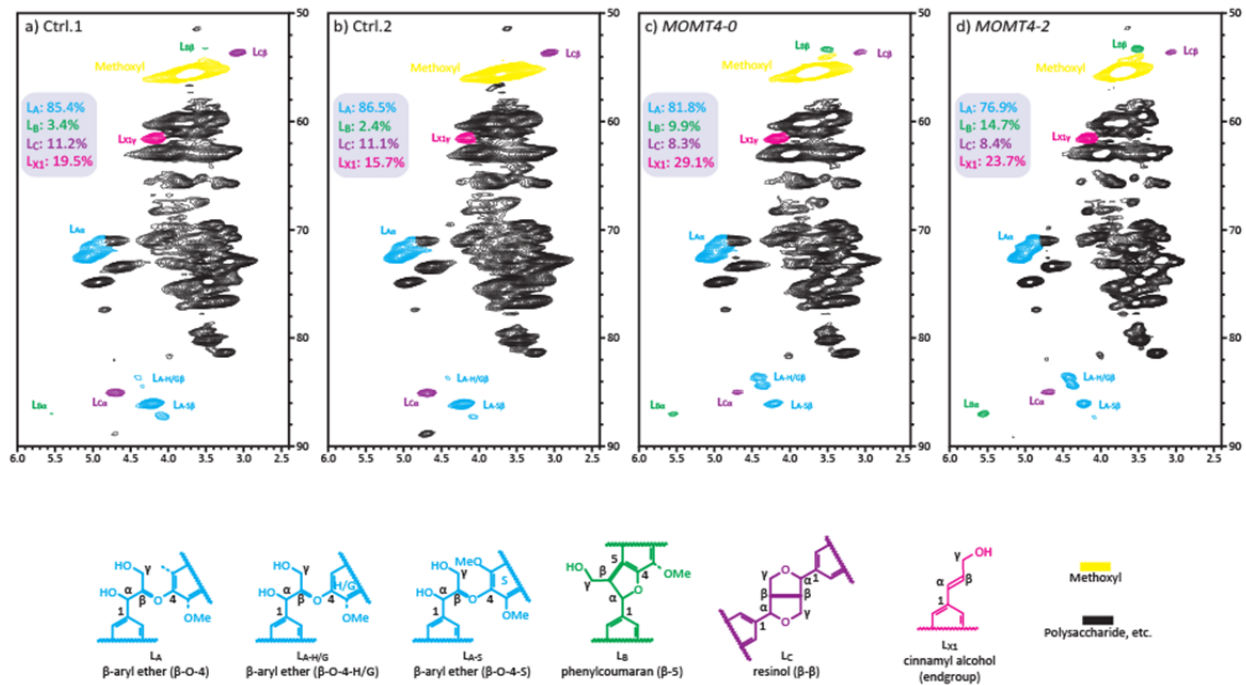

51  
52  
53  
54  
55  
56  
57  
58  
59  
60  
61  
62  
63  
64  
65  
66  
67  
68  
69  
70  
71  
72  
73  
74

**Supplementary Figure 3. Partial short range 2D HSQC NMR spectra of lignin aliphatic and polysaccharide region.** Equal amounts of solubilized cell walls of two control (a and b) and two *MOMT4* transgenic aspens (c and d) were examined. The main units, characterized by their inter-unit linkages, are colored to coincide with their structures at the bottom.

75  
76

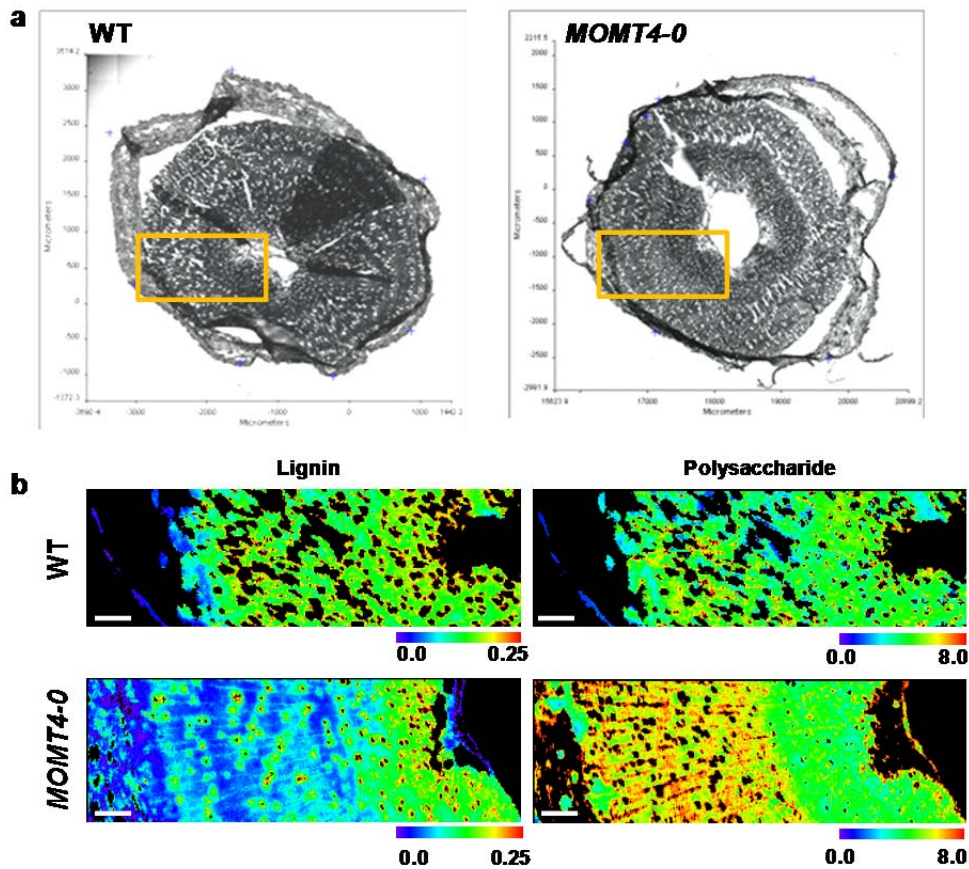

77  
78  
79  
80  
81  
82  
83  
84  
85  
86  
87  
88  
89  
90  
91  
92

**Supplementary Figure 4. Infrared imaging of a cross section of aspen stem and the crystalline cellulose content in *MOMT4* transgenic cell walls. (a) Light micrograph of a transverse section of hybrid aspen young stem. The frame illustrates the region imaged with the IR microscope. (b) Infrared images of the lignin ( $1510\text{ cm}^{-1}$ ) and polysaccharides ( $900\text{-}1180\text{ cm}^{-1}$ ) in aspen stem cross-section. The distribution of each component was generated by integrating the peaks centered at their characteristic IR absorptions. The content is shown as heat-map. Scale bar=  $25\text{ }\mu\text{m}$ .**

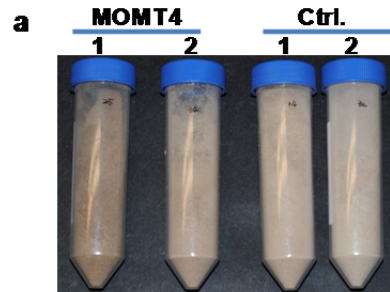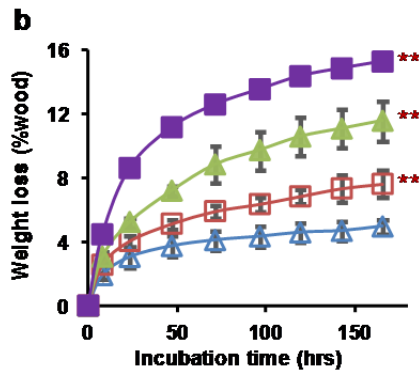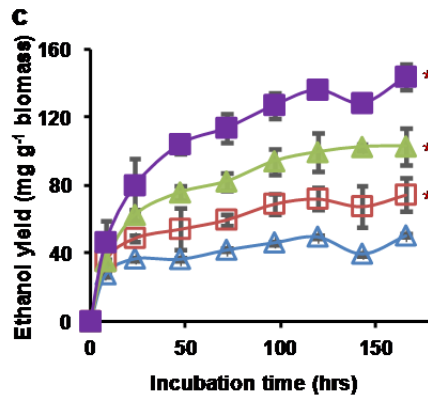

▲ Ctrl.    ■ MOMT4  
▲ Pretreated Ctrl.    ■ Pretreated MOMT4

93  
94  
95  
96  
97  
98  
99  
100  
101  
102  
103  
104  
105  
106  
107

**Supplementary Figure 5. Simultaneous saccharification and fermentation of about one year old *MOMT4-0* transgenic woods to ethanol.** Wood samples were pretreated with 1% (w/v)  $\text{Ca}(\text{OH})_2$  and incubated at 121 °C for 6 h. The Wood samples were collected from ~1 year old basal stems of the primary transgenic lines that had been coppiced three times and were maintained in a greenhouse. (a) Pretreated wood samples. #1 and #2 represent two replicates. (b) Fermentative gas release (representing biomass weight loss in broth) during simultaneous saccharification and fermentation (SSF) of the pretreated and untreated control and *MOMT4-0* transgenic woods. (c) Ethanol yield from the pretreated and untreated control and *MOMT4-0* transgenic woods during SSF. Data represent mean  $\pm$  s.d. of three experimental repeats. \*\*  $P < 0.01$  (Student's *t*-test) indicating significant difference compared to the control.

108  
109  
110

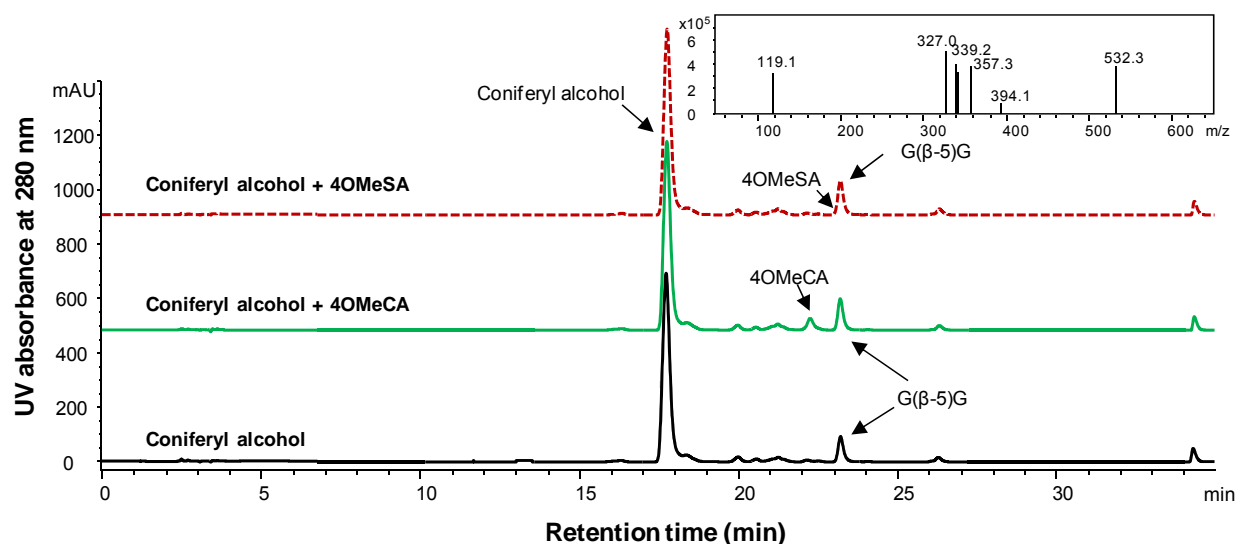

111  
112  
113  
114  
115  
116  
117  
118  
119

**Supplementary Figure 6. LCMS profiles of the *in vitro* oxidative polymerization reactions of coniferyl alcohol mixed with 4-*O*-methylated monolignols.**

4-*O*-methylated coniferyl alcohol (4OMeCA, green line) or 4-*O*-methylated sinapyl alcohol (4OMeSA, red line) were used, and reactions were catalyzed by peroxidase with H<sub>2</sub>O<sub>2</sub>. Note that no inhibition of 4OMeCA or 4OMeSA on the oxidative polymerization of the phenolic monomers was observed. Inset shows the MS spectrum of G(β-5)G dimer.

120  
121  
122  
123  
124  
125  
126  
127  
128  
129  
130  
131  
132  
133  
134  
135  
136  
137  
138  
139  
140

141  
142

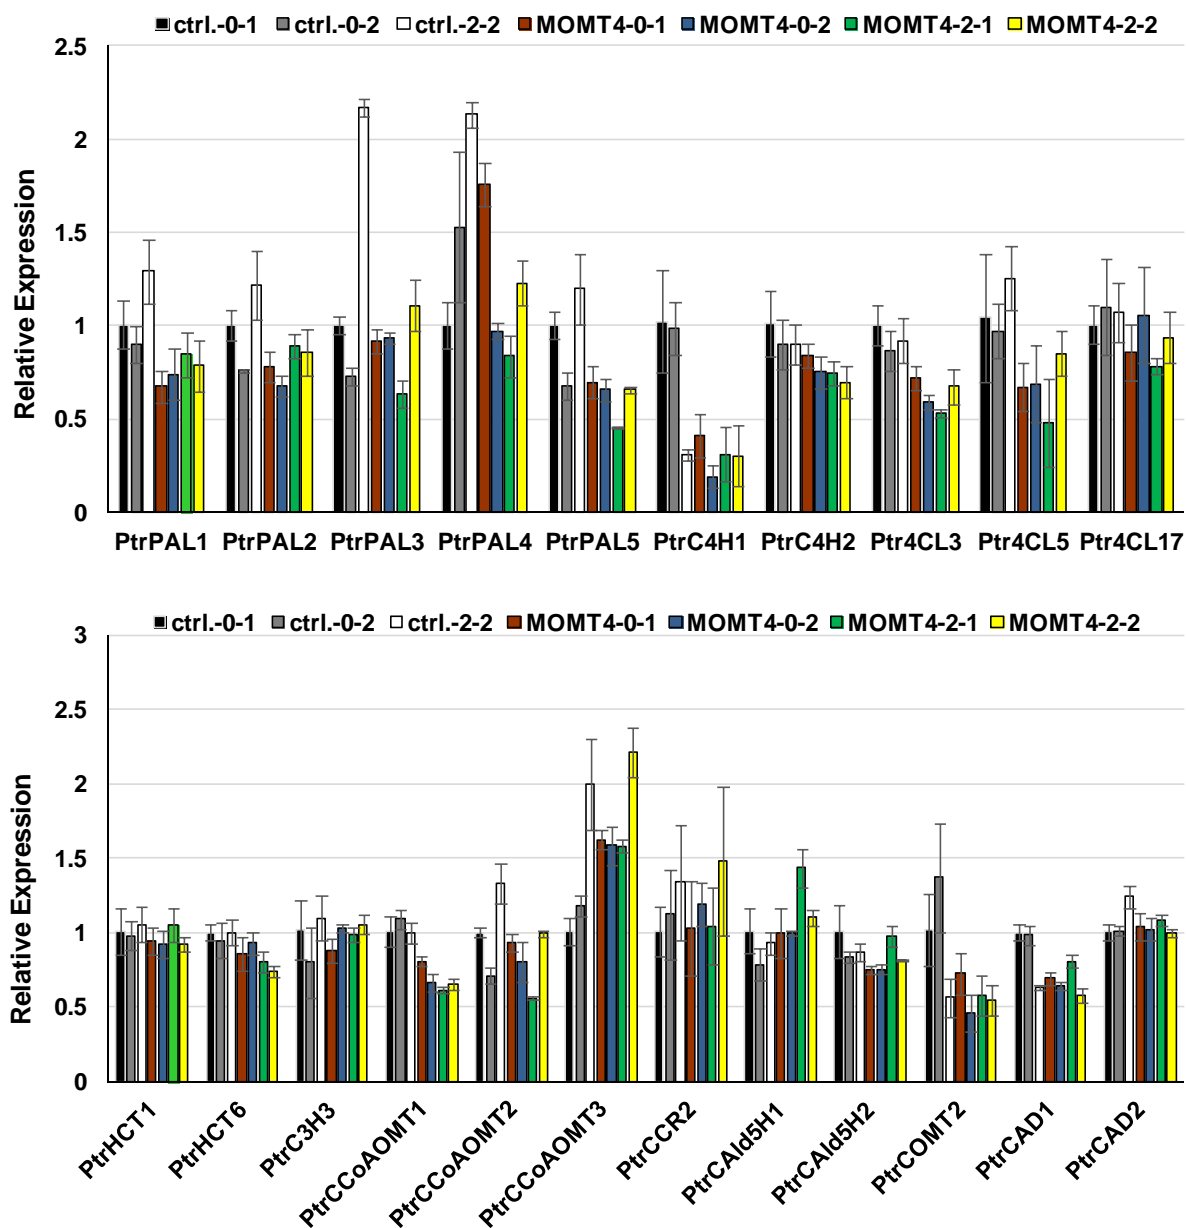

143  
144  
145  
146  
147  
148  
149  
150  
151  
152  
153  
154

**Supplementary Figure 7. Relative expression level of xylem specific monolignol biosynthetic genes in *MOMT4* transgenic and control lines.**

Data were obtained by quantitative RT-PCR and represent mean  $\pm$  s.d. of three replicates for each gene in each of control and *MOMT4* transgenic lines (each line with a biological duplicate). Data from one control line was set as 1.



155  
156  
157  
158

**Supplementary Table 1. Monomeric sugar composition of hemicelluloses extracted from *MOMT4* transgenic wood.**

| Genotype        | Rhamnose (%) | Arabinose (%) | Xylose (%) | Mannose (%) | Glucose (%) | Galactose (%) | Total (%)  |
|-----------------|--------------|---------------|------------|-------------|-------------|---------------|------------|
| <b>Control</b>  | 0.54 ±0.01   | 0.29±0.01     | 9.38±0.62  | 10.60±0.93  | 1.26±0.06   | 0.53±0.01     | 22.60±1.64 |
| <b>MOMT4-0</b>  | 0.58 ±0.04   | 0.31±0.02     | 9.12±0.75  | 8.70±1.60   | 1.43±0.12   | 0.59±0.03     | 20.73±2.39 |
| <b>MOMT4-2</b>  | 0.55±0.01    | 0.29±0.01     | 11.32±1.41 | 8.71±1.94   | 1.35±0.22   | 0.53±0.02     | 22.74±3.07 |
| <b>MOMT4-7</b>  | 0.57±0.02    | 0.31±0.01     | 10.13±0.5  | 9.98±2.29   | 1.60±0.28   | 0.55±0.03     | 23.15±2.83 |
| <b>MOMT4-10</b> | 0.55±0.01    | 0.28±0.01     | 8.3±0.2    | 13.88±0.56* | 2.04±0.08** | 0.53±0.01     | 25.55±0.79 |

159 The values are expressed as % of cell wall residues and represent mean ± s.e. from three  
160 biological replicates (each with three technical repeats) for control set and three technical  
161 repeats for each transgenic line. Statistic analysis was performed with Student's *t*-test (\*  
162  $P<0.05$ , \*\*  $P<0.01$ )

163  
164  
165  
166  
167  
168  
169  
170

**Supplementary Table 2. The stem height, basal stem diameter, and biomass yield of 3 or 6 month old aspen plants.**

|                | 3 months         |               | 6 months         |               |             |
|----------------|------------------|---------------|------------------|---------------|-------------|
|                | Stem height (cm) | Diameter (cm) | Stem height (cm) | Diameter (cm) | Biomass (g) |
| <b>Control</b> | 90.6±12.8        | 0.85±0.07     | 254.7±42.5       | 1.78±0.22     | 120.4±22.5  |
| <b>MOMT4-0</b> | 94.8±8.9         | 0.92±0.03     | 247.3±23.2       | 1.84±0.19     | 112.5±24.9  |
| <b>MOMT4-2</b> | 77.9±7.3         | 0.81±0.04     | 209.7±16.8       | 1.81±0.03     | 105.5±8.6   |
| <b>MOMT4-7</b> | 91.4±11.6        | 0.9±0.01      | 233.0±19.9       | 1.72±0.08     | 107.7±11.2  |

171 Data represent mean ± s.d. of three biological replicates for each of control and transgenic line.  
172 Student's *t*-test reveals no statistic difference between the control and individual *MOMT4*  
173 transgenic line.

174  
175  
176  
177  
178  
179  
180

181  
 182 **Supplementary Table 3. Effects of 4-*O*-methylated coniferyl alcohol and 4-*O*-methylated**  
 183 **sinapyl alcohol on the activities of enzymes involved in sinapyl alcohol biosynthesis.**  
 184

| Substrate                | Enzyme activity (nmol·min <sup>-1</sup> ·mg <sup>-1</sup> ) |                        |                        |
|--------------------------|-------------------------------------------------------------|------------------------|------------------------|
|                          | Ctrl.                                                       | 4OMeCA                 | 4OMeSA                 |
| <b>coniferaldehyde</b>   |                                                             |                        |                        |
| PtrCAD                   | 96.97±2.37                                                  | 87.82±1.32**           | 88.60±1.42**           |
| PtrSAD                   | 23.29±0.24                                                  | 23.34±0.83             | 22.99±0.93             |
| PtrSTEX                  | 83.95±0.21                                                  | 82.90±0.17*            | 85.82±2.64             |
| <b>sinpaldehyde</b>      |                                                             |                        |                        |
| PtrCAD                   | 310.55±6.40                                                 | 265.72±1.95**          | 299.12±10.65           |
| PtrSAD                   | 203.23±8.65                                                 | 184.50±4.73*           | 175.83±2.32**          |
| PtrSTEX                  | 182.5±0.59                                                  | 163.93±1.02**          | 182.57±6.90            |
| <b>caffeic acid</b>      |                                                             |                        |                        |
| PtrCOMT                  | 424.42±6.12                                                 | 434.36±3.57            | 433.78±3.98            |
| PtrSTEX                  | 4.55±0.02                                                   | 4.66±0.03**            | 4.58±0.01              |
| <b>coniferyl alcohol</b> |                                                             |                        |                        |
| PtrCAld5H/WAT11          | 2.28±0.18 <sup>a</sup>                                      | 2.41±0.09 <sup>a</sup> | 2.45±0.23 <sup>a</sup> |

185 Data represent mean ± s.d. of triplicates. \*  $P < 0.05$ ; \*\*  $P < 0.01$  (Student's *t*-test); 4OMeCA: 4-*O*-  
 186 methylated coniferyl alcohol; 4OMeSA: 4-*O*-methylated sinapyl alcohol  
 187 <sup>a</sup>pmol·min<sup>-1</sup>·mg<sup>-1</sup>  
 188  
 189  
 190  
 191  
 192  
 193  
 194  
 195  
 196  
 197  
 198  
 199  
 200  
 201  
 202  
 203  
 204  
 205  
 206  
 207  
 208  
 209  
 210  
 211

212 **Supplementary Table 4. The up- and down-regulated genes in *MOMT4-0* transgenic line**  
 213 **detected with RNA-sequence analysis.** The differentially expressed genes with  $\text{Log}^2 \geq 1$   
 214 and  $\leq -1$  and with False Discovery Rate adjusted  $P < 0.05$  between *MOMT4-0* transgenic  
 215 and control plants were selected.  
 216

| Test_ID          | Orthologue gene_ID | Arabidopsis annotation                                               | WT      | MOMT4   | $\text{Log}^2(\text{MOMT4}/\text{WT})$ |
|------------------|--------------------|----------------------------------------------------------------------|---------|---------|----------------------------------------|
| MyGene           | MOMT4              | Over-expressed gene                                                  | 1221.8  | 4.78528 | 7.996189                               |
| Potri.001G024900 | AT2G38750.1        | Annexin 4                                                            | 24.6869 | 1.62984 | 3.920943                               |
| Potri.019G031200 | AT5G18280.2        | Apyrase 2                                                            | 20.8676 | 1.96577 | 3.408098                               |
| Potri.013G080300 | AT4G24340.1        | Phosphorylase superfamily protein                                    | 33.9166 | 4.39997 | 2.946426                               |
| Potri.008G131200 | AT1G14930.1        | Polyketide cyclase/dehydrase and lipid transport superfamily protein | 169.477 | 22.9856 | 2.882287                               |
| Potri.014G126900 | AT4G02290.1        | Glycosyl hydrolase 9B13                                              | 12.5103 | 2.47025 | 2.340387                               |
| Potri.004G106600 | AT3G25180.1        | Cytochrome P450,CYP82G1                                              | 37.2716 | 9.11907 | 2.031118                               |
| Potri.013G080400 | AT4G24350.1        | Phosphorylase superfamily protein                                    | 83.5143 | 20.6367 | 2.016811                               |
| Potri.004G123200 | AT1G69530.1        | Expansin A1                                                          | 33.3327 | 8.63563 | 1.948565                               |
| Potri.018G031100 | AT5G11420.1        | Protein of unknown function, DUF642                                  | 103.209 | 28.1813 | 1.872759                               |
| Potri.014G126000 | AT5G64260.1        | EXORDIUM like 2                                                      | 62.808  | 17.6666 | 1.829924                               |
| Potri.004G168600 | AT4G38770.1        | Proline-rich protein 4                                               | 28.2242 | 8.0906  | 1.802614                               |
| Potri.012G032700 | AT1G74100.1        | Sulfotransferase 16                                                  | 26.7991 | 7.77299 | 1.785643                               |
| Potri.006G245600 | AT4G13340.1        | Leucine-rich repeat (LRR) family protein                             | 51.6807 | 15.5388 | 1.733751                               |
| Potri.017G085300 | AT3G29030.1        | Expansin A5                                                          | 18.4512 | 5.87431 | 1.651223                               |
| Potri.006G065500 | AT2G10940.1        | Bifunctional inhibitor/lipid-transfer protein                        | 173.155 | 55.3255 | 1.646048                               |
| Potri.004G051900 | AT5G45950.1        | GDSL-like Lipase/Acylhydrolase superfamily protein                   | 19.319  | 7.08953 | 1.446259                               |
| Potri.006G099900 | AT3G51860.1        | Cation exchanger 3                                                   | 25.587  | 9.9398  | 1.364122                               |
| Potri.019G055200 | AT1G08450.1        | Calreticulin 3                                                       | 78.6247 | 31.3292 | 1.327475                               |
| Potri.013G033200 | AT1G24140.1        | Matrixin family protein                                              | 37.1626 | 15.3381 | 1.276732                               |
| Potri.016G113100 | AT2G38110.1        | Glycerol-3-phosphate acyltransferase 6                               | 22.2598 | 9.33544 | 1.253651                               |
| Potri.019G050200 | AT4G24340.1        | Phosphorylase superfamily protein                                    | 219.761 | 93.7438 | 1.22914                                |
| Potri.007G100100 | AT5G09220.1        | Amino acid permease 2                                                | 37.4223 | 88.542  | -1.24246                               |
| Potri.005G172400 | AT1G37130.1        | Nitrate reductase 2                                                  | 10.2372 | 24.5262 | -1.2605                                |
| Potri.005G200400 | AT5G09970.1        | Cytochrome P450, CYP78A7                                             | 11.562  | 31.7595 | -1.4578                                |
| Potri.005G014300 | AT1G09240.1        | Nicotianamine synthase 3                                             | 28.5745 | 78.9822 | -1.4668                                |
| Potri.006G223900 | AT5G12020.1        | 17 kDa class II heat shock protein                                   | 21.8466 | 79.3612 | -1.86103                               |
| Potri.004G140800 | AT2G15620.1        | Nitrite reductase 1                                                  | 15.3092 | 66.3609 | -2.11593                               |

217

218

219

220

221

222

223

224

225

**Supplementary Table 5. Primers used in the study**

| Name                                  | Sequence(5'-3')                             | Reference Gene ID |
|---------------------------------------|---------------------------------------------|-------------------|
| <b>For cloning bean PAL2 Promoter</b> |                                             |                   |
| PAL2_HindIII F                        | CCCAAGCTTAAAAGTCTAAGCCAA                    |                   |
| PAL2_KpnI R                           | GGGGTACCATGAAGGAATGA                        |                   |
| <b>For cloning poplar genes</b>       |                                             |                   |
| PtrCADSLICF                           | ACAAAAAAGCAGGCTCCGAATTCATGGGTAGCCTTGAAACAG  | POPTR_0009s09870g |
| PtrCADnsSLICR                         | ACAAGAAAGCTGGGTGCAATTCGGGAATAAGCTTGCTACC    |                   |
| PtrSADSLICF                           | ACAAAAAAGCAGGCTCCGAATTCATGTCCAAGTCACCAGAAAG | POPTR_0016s07910g |
| PtrSADnsSLICR                         | ACAAGAAAGCTGGGTGCAATTCGGGCTTCGTAGCTGCCAAAGT |                   |
| PtrF5HSLICF                           | ACAAAAAAGCAGGCTCCGAATTCATGGATTCTCTTGCCAATC  | POPTR_0007s13720g |
| PtrF5HnsSLICR                         | ACAAGAAAGCTGGGTGCAATTCGAGAGGGGCATAGCACACG   |                   |
| <b>For qRT-PCR analysis</b>           |                                             |                   |
| PtrPAL1RTF                            | CCATCCAGGTCAAATTGAGGCTGCT                   | Potri.006G126800  |
| PtrPAL1RTR                            | ACTTCTTAGCTGCCTTCATGTAAGCT                  |                   |
| PtrPAL2RTF                            | CCTAGAAGCCATCACCAAGTTGCTC                   | Potri.008G038200  |
| PtrPAL2RTR                            | GTTTCTCCATTGGGTCCCACG                       |                   |
| PtrPAL3RTF                            | CATCCAGGTCAAATTGAGGCTGCA                    | Potri.016G091100  |
| PtrPAL3RTR                            | ACTTCTTAGCTGCCTTCATGTAAGC                   |                   |
| PtrPAL4RTF                            | GAGATGCTGGAAGCTATCACCAAAT                   | Potri.010G224100  |
| PtrPAL5RTF                            | GAGATGCTGGAAGCTATCACCAAGC                   | Potri.010G224100  |
| PtrPAL4/5RTR                          | GGCTCTCCATTGGGTCCAAC                        |                   |
| PtrC4H1RTF                            | AGTGCGCCATAGACCATATCCTC                     | Potri.013G157900  |
| PtrC4H1RTR                            | ATTGCAGCGACGTTGATGTTCTCA                    |                   |
| PtrC4H2RTF                            | GaAATGTGCAATTGATCATATTTG                    | Potri.019G130700  |
| PtrC4H2RTR                            | ATTGCAGCAACATTGATGTTCTCC                    |                   |
| Ptr4CL3RTF                            | ACTAGCCCATCCAGAGATATCCGA                    | Potri.001G036900  |
| Ptr4CL3RTR                            | TCATCTTCGGTGGCCTGAGACTTT                    |                   |
| Ptr4CL5RTF                            | GTGATCATGCTCATCCTGCCAAGT                    | Potri.003G188500  |
| Ptr4CL5RTR                            | TTGGCAGCAGTAGTAATGGCACCT                    |                   |
| PtrC3H3RTF                            | GTATGACCTTAGTGAAGACACAATCAT                 | Potri.006G033300  |
| PtrC3H3RTR                            | CCCTTGGGTTCTTGATTAGCTC                      |                   |
| PtrHCT1RTF                            | ATCAGCATGTAAGGCACGCGG                       | Potri.003G183900  |
| PtrHCT1RTR                            | TGCCAAAGTAACCAGGTGGAAGCGT                   |                   |
| PtrHCT6RTF                            | AGATCAACATGCAAAGCACGTGA                     | Potri.001G042900  |
| PtrHCT6RTR                            | GCCAAAGTAACCAGGAGGGAGTTG                    |                   |
| PtrCCoAOMT1RTF                        | CAGTAATTCAGAAAGCTGGTGTTCG                   | Potri.009G099800  |
| PtrCCoAOMT1RTR                        | GCATCCACAAAGATGAAATCAAAC                    |                   |
| PtrCCoAOMT2/3RTF                      | CCTTCCAACGCCAGGAAAGAGAGTA                   |                   |
| PtrCCoAOMT2RTR                        | GTGGCCAACCTTCTTGATGCCTTCCG                  | Potri.001G304800  |
| PtrCCoAOMT3RTR                        | TGCACACAGCAACCATAGAGGACA                    | Potri.008G136600  |

|                |                             |                   |
|----------------|-----------------------------|-------------------|
| PtrCCR2RTF     | CGGTGATTCAGAAAGCTGGTCTGGA   | Potri.003G181400  |
| PtrCCR2RTR     | GCATCCACAAAGATGAAGTCATAAG   |                   |
| PtrCAId5H1RTF  | AATCCAATATAGGCAAGCCTGTGAACG | Potri.005G117500  |
| PtrCAId5H1RTR2 | ATTTTTGGCCCCAAAAGCTGCTCTA   |                   |
| PtrCAId5H2RTF  | AAGCCAATATAGGCAAGCCTGTGAATC | Potri.007G016400  |
| PtrCAId5H2RTR  | ATTTTTAGCCCCGAAAGCTGCTCTG   |                   |
| PtrCOMT2RTF    | TCTTGAAGAATTGCTATGACGCCT    | Potri.012G006400  |
| PtrCOMT2RTR    | GAATGCACTCAACAAGTATCACCTTG  |                   |
| PtrCAD1RTF     | GGCAAGCTGATCTTGATGGGTGTT    | Potri.009G095800  |
| PtrCAD1RTR     | TCCCGGTGATTGACTTTCTCCCAA    |                   |
| PtrCAD2RTF     | AGTGACAGAAGTTGGGAGCAAGG     | Potri.016G078300  |
| PtrCAD2RTR     | AGTGACATGCACCAACCAAGCATC    |                   |
| PtrPT1RTF      | GCGGAAAGAAAACTGCAAG         | POPTR_0014s03160  |
| PtrPT1RTR      | TGACAGCACAGCCCAATAAG        |                   |
| Ptr4CL17RTF    | CATGCCTGTGTGCGCCAACCATTAT   | POPTR_0012s09670g |
| Ptr4CL17RTR    | GCAACTGAACCTCCGCAATGAACT    |                   |
| PtrCOMT24RTF   | ACTGTGCGGAAAGCAATGCCTGAGA   | POPTR_0019s13400g |
| PtrCOMT24RTR   | TTGGCCATTTCTTCTGGTTGCAG     |                   |

---

228  
229  
230
